# Supplementary material for: [Au7Ag9(dppf)3(CF3CO2)7BF4]n: a linear nanocluster polymer from molecular Au7Ag8 clusters covalently linked by silver atoms
Source: Royal Society of Chemistry journal article supplement (doi:10.1039/c9cc05924e), 2019-01-01
Supplement: c9cc05924e1.pdf [file c9cc05924e1.pdf]

## Supporting Information

### **[Au<sub>7</sub>Ag<sub>9</sub>(dppf)<sub>3</sub>(CF<sub>3</sub>CO<sub>2</sub>)<sub>7</sub>BF<sub>4</sub>]<sub>n</sub>: A Linear Nanocluster Polymer from Molecular Au<sub>7</sub>Ag<sub>8</sub> Clusters Covalently Linking by Silver Atoms**

Zhao-Rui Wen,<sup>a</sup> Zong-Jie Guan,<sup>a</sup> Ying Zhang,<sup>a</sup> Yu-Mei Lin<sup>\*a</sup> and Quan-Ming Wang<sup>ab</sup>

<sup>a</sup> Department of Chemistry, College of Chemistry and Chemical Engineering Xiamen, 361005, P. R. China.

<sup>b</sup> Department of Chemistry, Tsinghua University, China

E-mail: linyum@xmu.edu.cn

## Contents

### I. Physical measurements

### II. Characterization

**Fig. S1.** IR spectrum of  $[\text{Au}_7\text{Ag}_9(\text{dppf})_3(\text{CF}_3\text{CO}_2)_7\text{BF}_4]_n$ .

**Fig. S2.** Mass spectra of  $[\text{Au}_7\text{Ag}_9(\text{dppf})_3(\text{CF}_3\text{CO}_2)_7\text{BF}_4]_n$ .

**Table S1.** Crystal data and structure refinement for  $[\text{Au}_7\text{Ag}_9(\text{dppf})_3(\text{CF}_3\text{CO}_2)_7\text{BF}_4]_n$ .

### III. Survey of the reaction conditions in purpose to obtain the monomer.

**Table S2.** The types and amount of reactants in the synthesis process.

**Fig. S3.** Absorption spectra of **1** and the solutions after addition of the different amounts of NaCl or  $\text{NH}_4\text{Cl}$ .

### IV. The stability of **1** in solution state.

**Fig. S4.** Time dependences of absorption spectra of **1** in  $\text{CH}_3\text{COCH}_3$ .

**Fig. S5.** Time dependences of absorption spectra of **1** in  $\text{CH}_3\text{OH}$ .

**Fig. S6.** Time dependences of absorption spectra of **1** in  $\text{CH}_3\text{CN}$ .

## **I. Physical measurements**

UV-Vis absorption spectrum was recorded on a Shimadzu UV-2550 spectrophotometer. Mass spectra were recorded on an Apex Ultra 7.0T FTICR-MS. IR spectrum was recorded on a Nicolet iS50 FT-IR instrument. X-ray photoelectron spectroscopy (XPS) was recorded on PHI Quantum-2000 XPS. The sample was put under UHV to reach the  $10^{-8}$  Pa range. The non-monochromatized Al K $\alpha$  source was used at 10 kV and 10 mA. All binding energies were calibrated using the C(1s) carbon peak (284.8 eV), which was applied as an internal standard. High resolution narrow-scan spectra were recorded with the electron pass energy of 50 eV and take off angle of  $55^\circ$  to achieve the maximum spectral resolution.

## **X-ray Crystallography**

Intensity data of compound **1** was collected on an Agilent SuperNova Dual system (Mo K $\alpha$ , 100K). Absorption corrections were applied by using the program CrysAlis (multi-scan). The structure was solved by direct methods, and non-hydrogen atoms except solvent molecules and counteranions were refined anisotropically by least-squares on  $F^2$  using the SHELXTL program.

## **Materials and reagents.**

Silver tetrafluoroborate ( $\text{AgBF}_4$ , 98%) and Silver trifluoroacetate ( $\text{AgCF}_3\text{CO}_2$ , 98%) were purchased from *J&K*; 1,1'-Bis(diphenylphosphino)ferrocene,  $((\text{C}_6\text{H}_5)_2\text{PC}_5\text{H}_4\text{FeC}_5\text{H}_4\text{P}(\text{C}_6\text{H}_5)_2$ , 99%) was purchased from Shanghai Boka Chemical Technology Co. Ltd. (Shanghai, China); Sodium borohydride ( $\text{NaBH}_4$ , 98%) and other reagents employed were purchased from Sinopharm Chemical Reagent Co. Ltd. (Shanghai, China). All reagents were used as received without further purification.

## II. Characterization

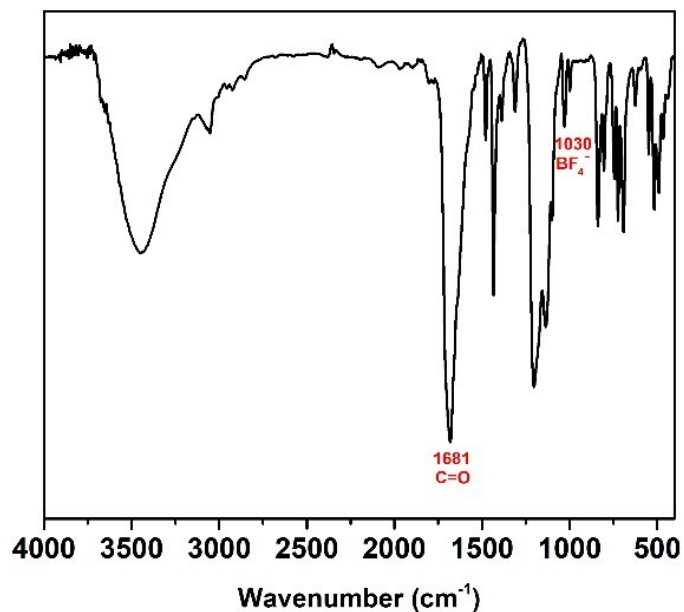

Fig. S1. IR spectrum of  $[\text{Au}_7\text{Ag}_9(\text{dppf})_3(\text{CF}_3\text{CO}_2)_7\text{BF}_4]_n$  (KBr pellet).

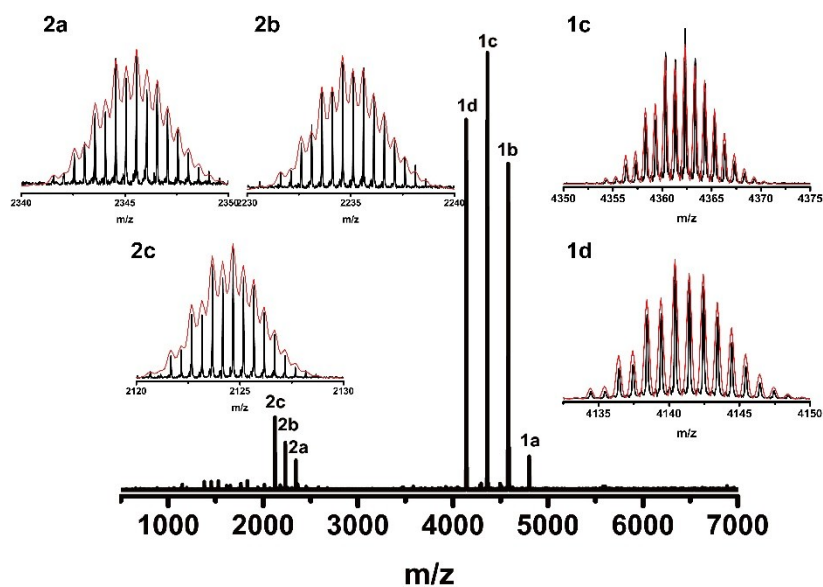

Fig. S2. Mass spectra of  $[\text{Au}_7\text{Ag}_9(\text{dppf})_3(\text{CF}_3\text{CO}_2)_7\text{BF}_4]_n$ . Inset: The measure (black trace) and simulated (red trace) isotopic patterns of  $[\text{Au}_7\text{Ag}_7(\text{dppf})_3(\text{CF}_3\text{CO}_2)_5]^+$  (1c),  $[\text{Au}_7\text{Ag}_6(\text{dppf})_3(\text{CF}_3\text{CO}_2)_4]^+$  (1d),  $[\text{Au}_7\text{Ag}_9(\text{dppf})_3(\text{CF}_3\text{CO}_2)_6]^{2+}$  (2a),  $[\text{Au}_7\text{Ag}_8(\text{dppf})_3(\text{CF}_3\text{CO}_2)_5]^{2+}$  (2b) and  $[\text{Au}_7\text{Ag}_7(\text{dppf})_3(\text{CF}_3\text{CO}_2)_4]^{2+}$  (2c).

**Table S1.** Crystal data and structure refinement for  $[\text{Au}_7\text{Ag}_9(\text{dppf})_3(\text{CF}_3\text{CO}_2)_7\text{BF}_4]_n$ .

|                                                |                                                                                                     |
|------------------------------------------------|-----------------------------------------------------------------------------------------------------|
| Empirical formula                              | $\text{C}_{116}\text{H}_{84}\text{Ag}_9\text{Au}_7\text{BF}_{25}\text{Fe}_3\text{O}_{14}\text{P}_6$ |
| Formula weight                                 | 4890.60                                                                                             |
| Temperature/K                                  | 100.01(10)                                                                                          |
| Crystal system                                 | triclinic                                                                                           |
| Space group                                    | <i>P</i> -1                                                                                         |
| <i>a</i> /Å                                    | 14.7746(3)                                                                                          |
| <i>b</i> /Å                                    | 17.3633(4)                                                                                          |
| <i>c</i> /Å                                    | 30.4935(6)                                                                                          |
| $\alpha$ /°                                    | 88.524(2)                                                                                           |
| $\beta$ /°                                     | 86.188(2)                                                                                           |
| $\gamma$ /°                                    | 65.006(2)                                                                                           |
| Volume/Å <sup>3</sup>                          | 7074.4(3)                                                                                           |
| <i>Z</i>                                       | 2                                                                                                   |
| $\rho_{\text{calc}}/\text{cm}^3$               | 2.296                                                                                               |
| $\mu/\text{mm}^{-1}$                           | 8.889                                                                                               |
| F(000)                                         | 4532                                                                                                |
| Crystal size/mm <sup>3</sup>                   | 0.3 × 0.1 × 0.1                                                                                     |
| Radiation                                      | MoK $\alpha$ ( $\lambda = 0.71073$ )                                                                |
| 2 $\theta$ range for data collection/°         | 6.808 to 50                                                                                         |
| Index ranges                                   | -15 ≤ <i>h</i> ≤ 17, -14 ≤ <i>k</i> ≤ 20, -36 ≤ <i>l</i> ≤ 36                                       |
| Reflections collected                          | 45544                                                                                               |
| Independent reflections                        | 24649 [ $R_{\text{int}} = 0.0542$ , $R_{\text{sigma}} = 0.0828$ ]                                   |
| Data/restraints/parameters                     | 24649/10/884                                                                                        |
| Goodness-of-fit on F <sup>2</sup>              | 1.049                                                                                               |
| Final <i>R</i> indexes [ $I \geq 2\sigma(I)$ ] | $R_1 = 0.1468$ , $wR_2 = 0.3586$                                                                    |
| Final <i>R</i> indexes [all data]              | $R_1 = 0.1638$ , $wR_2 = 0.3669$                                                                    |
| Largest diff. peak/hole / e Å <sup>-3</sup>    | 5.86/-6.11                                                                                          |

### III. Survey of the reaction conditions in purpose to obtain the monomer

Survey of the reaction conditions in purpose to obtain the monomer cluster of  $[\text{Au}_7\text{Ag}_9]_n$  polymer. The procedure was similar to the synthesis of  $[\text{Au}_7\text{Ag}_9]_n$ , except for the types of reactants and/or the ratios of  $\text{CF}_3\text{CO}_2^-:\text{Ag}:\text{Au}$  were changed. The detail information was listed in Table S2. The condition in entry 1 was used for the synthesis of polymer 1. It can be also obtained with lower yield by a little increase the amount of  $\text{AgCF}_3\text{CO}_2$  (entry 4). The unidentified precipitates were obtained for all the other conditions (entries 2-3, 5-18).

**Table S2.** The types and amount of reactants in the synthesis process.

| Entry | $\text{AgCF}_3\text{CO}_2$<br>(mmol) | $\text{NaCF}_3\text{CO}_2$<br>(mmol) | $\text{AgBF}_4$<br>(mmol) | $\text{dppf}(\text{AuBF}_4)_2$<br>(mmol) | $\text{CF}_3\text{CO}_2^-:\text{Ag}:\text{Au}$ |
|-------|--------------------------------------|--------------------------------------|---------------------------|------------------------------------------|------------------------------------------------|
| 1     | 0.10                                 |                                      |                           | 0.02                                     | 2.5:2.5:1                                      |
| 2     | 0.04                                 |                                      |                           | 0.02                                     | 1:1:1                                          |
| 3     | 0.06                                 |                                      |                           | 0.02                                     | 1.5:1.5:1                                      |
| 4     | 0.08                                 |                                      |                           | 0.02                                     | 2:2:1                                          |
| 5     | 0.12                                 |                                      |                           | 0.02                                     | 3:3:1                                          |
| 6     | 0.14                                 |                                      |                           | 0.02                                     | 3.5:3.5:1                                      |
| 7     | 0.16                                 |                                      |                           | 0.02                                     | 4:4:1                                          |
| 8     | 0.18                                 |                                      |                           | 0.02                                     | 4.5:4.5:1                                      |
| 9     | 0.2                                  |                                      |                           | 0.02                                     | 5:5:1                                          |
| 10    | 0.1                                  | 0.02                                 |                           | 0.02                                     | 3:2.5:1                                        |
| 11    | 0.1                                  | 0.04                                 |                           | 0.02                                     | 3.5:2.5:1                                      |
| 12    | 0.1                                  | 0.06                                 |                           | 0.02                                     | 4:2.5:1                                        |
| 13    | 0.1                                  | 0.08                                 |                           | 0.02                                     | 4.5:2.5:1                                      |
| 14    | 0.1                                  | 0.1                                  |                           | 0.02                                     | 5:2.5:1                                        |
| 15    | 0.1                                  |                                      | 0.02                      | 0.02                                     | 2.5:3:1                                        |
| 16    | 0.1                                  |                                      | 0.04                      | 0.02                                     | 2.5:3.5:1                                      |
| 17    | 0.1                                  |                                      | 0.06                      | 0.02                                     | 2.5:4:1                                        |
| 18    | 0.1                                  |                                      | 0.08                      | 0.02                                     | 2.5:4.5:1                                      |

The attempts to obtain monomers from  $[\text{Au}_7\text{Ag}_9]_n$  polymers have also been tried. Chloride ions were introduced with the propose to breakdown the silver linkers in the polymer **1**. To 1 mL  $\text{CH}_2\text{Cl}_2$  solution of  $[\text{Au}_7\text{Ag}_9]_n$  (0.5 mg,  $1.02 \times 10^4$  mmol), different amounts of NaCl (0.0001, 0.005, 0.01 mmol) or  $\text{NH}_4\text{Cl}$  (0.0001, 0.01 mmol) were added. The color of the mixture changed from dark red to yellow immediately. UV-vis spectra showed the newly formation species display greatly distinct absorption properties compared with that of **1**. Unfortunately, attempts to obtain the single-crystal structures all failed.

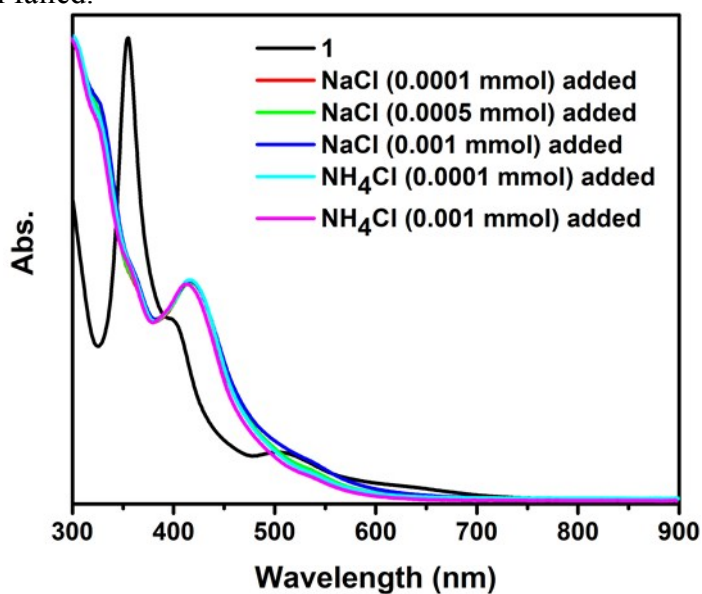

**Fig. S3.** Absorption spectra of **1** and the solutions after addition of the different amounts of NaCl or  $\text{NH}_4\text{Cl}$ .

#### IV. The stability of **1** in solution state.

The solubility and stability of **1** in several common solvents have been tested. Polymer **1** is nearly insoluble in toluene, and has very poor solubility in ether. It can be dissolved in acetone, acetonitrile and methanol. As monitored by UV-Vis spectra, the degradation can be observed in all these solvents (Fig. S4-S6).

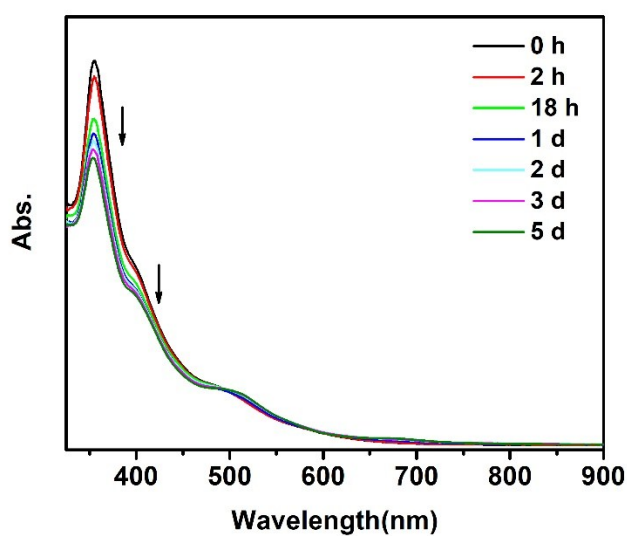

Fig. S4. Time dependences of absorption spectra of **1** in  $\text{CH}_3\text{COCH}_3$ .

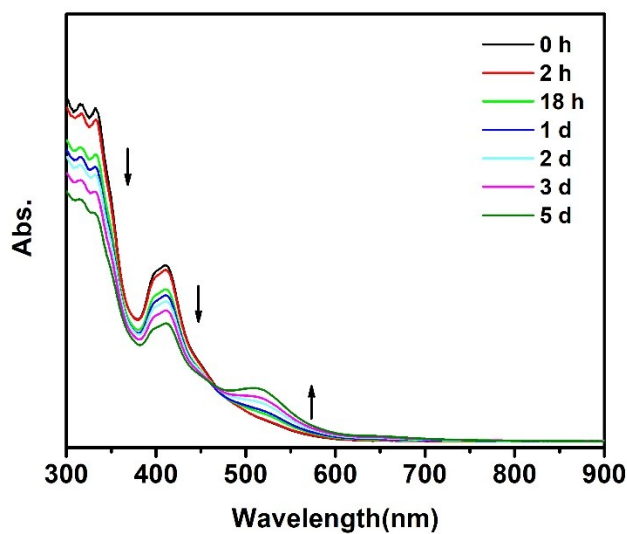

Fig. S5. Time dependences of absorption spectra of **1** in  $\text{CH}_3\text{OH}$ .



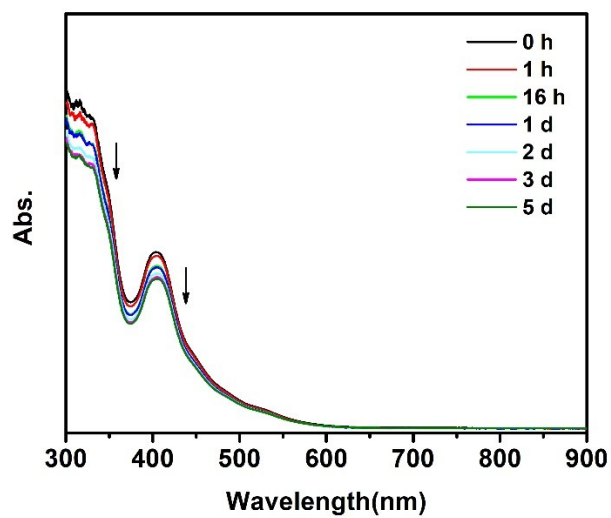

**Fig. S6.** Time dependences of absorption spectra of **1** in CH<sub>3</sub>CN.
